# Supplementary material
Source: PubMed Central journal article supplement (PMC4943847)
Supplement: NIHMS741806-supplement-ESI.pdf [file NIHMS741806-supplement-ESI.pdf]

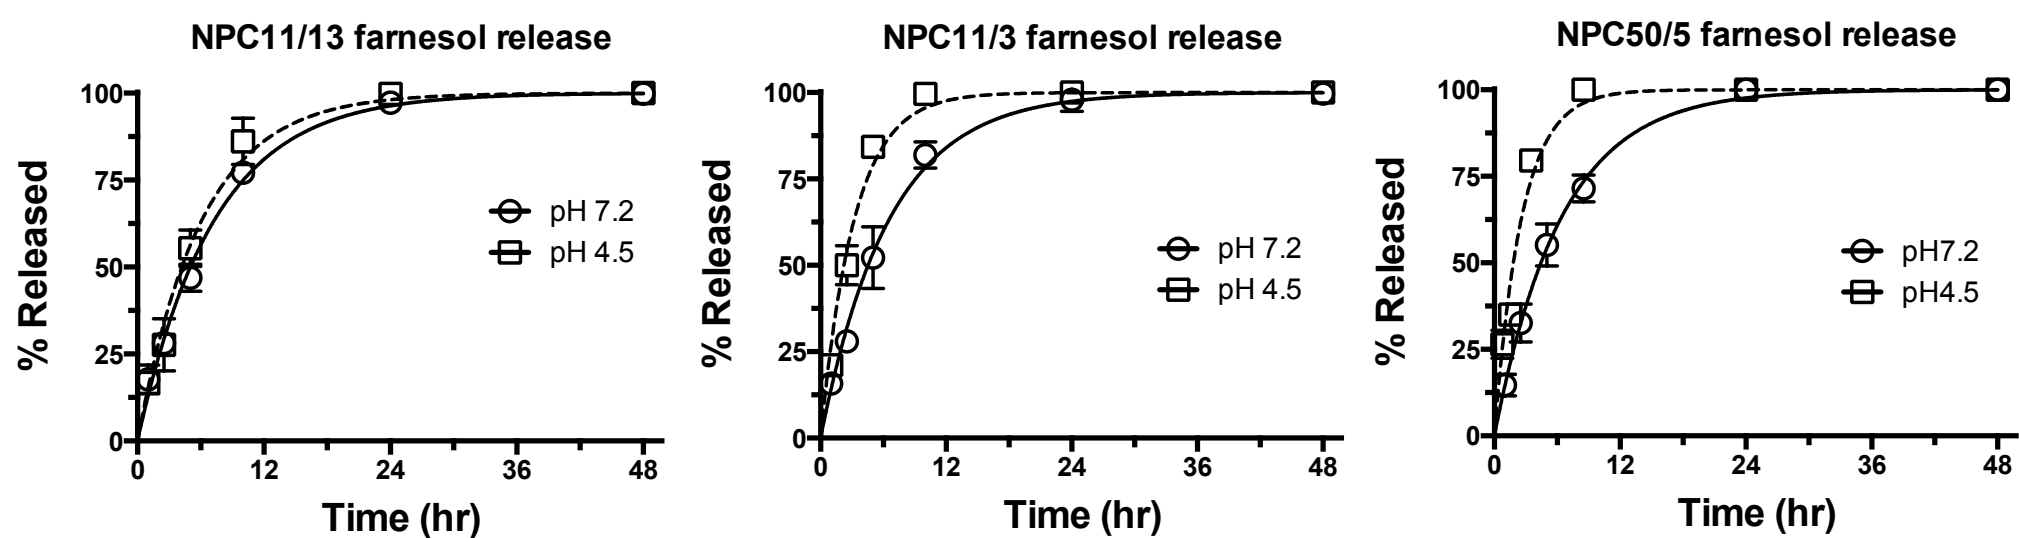

**Supplementary Figure 1.** Farnesol release profiles among NPC with different CCR at pH 7.2 and 4.5. Solid and dotted lines show fits ( $R^2 > 0.98$ ) to first-order drug release. (n=3)
